# Supplementary material
Source: Research Square preprint supplement (doi:10.21203/rs.3.rs-9653669/v1)
Supplement: Supplementary file 1 [file 2bad6755a99506217c6fea29.xlsx]

## Sheet: Supplementary Table 1
Supplementary Table 1. Sample Size for Maternal Biological and Questionnaire Data Collection Across Timepoints.
Type	Entry	Time
		Early Pregnancy	MOD
Blood	Folate/VB2/VB6	3006	1532
	Folate_antibody	3006	-
	Heavy metal	-	582
Questionnaire	Milk/Egg	678	-

## Sheet: Supplementary Table 2
Supplementary Table 2. Sample Size for Child Birth Outcome and Questionnaire Data Collection Across Timepoints
Type	Entry	Time
		3d	42d	6m	1y	2y	4y	7y	8y
neonatal birth outcome	Length	919	935	802	821	896	637	720	-
	Weight	1048	960	801	819	895	439	715	-
	Headcir	903	914	790	802	783	427	456	-
Questionnaire	Bayley	-	-	-	-	1921	-	-	-
	WISC	-	-	-	-	-	1433	-	-
	CANTAB	-	-	-	-	-	1266	-	-
	SDQ	-	-	-	-	-	1477	1285	-
	SRS	-	-	-	-	-	1469	-	-
	BRIEF	-	-	-	-	-	-	1280	-
	DSM	-	-	-	-	-	-	662	-
	SNAP	-	-	-	-	-	-	662	-
fnirs	FNIRS_task	-	-	-	-	-	333	-	767
	FNIRS_rest	-	-	-	-	-	682	-	1274

## Sheet: Supplementary Table 3
Supplementary Table 3. Demographic Information.
Variable	Mean ± SD or n (%)
Mother’s age	28.9 ± 3.4
Mother’s race
Han ethnicity	3611 (97.8)
Other	81 (1.1)
Maternal education
High school and below	1015 (27.5)
Junior college/Bachelor's	2104 (57.0)
Graduate and above	573 (15.5)
Annual family income (1000 CNY)
<100	298 (8.1)
100–300	2552 (69.1)
≥300	804 (21.8)
Unknown	40 (1.1)
Maternal passive smoking during pregnancy
Yes	520 (14.1)
No	3172 (85.9)
Maternal alcohol consumption during pregnancy
Yes	834 (22.6)
No	2858 (77.4)
Parity
0	3221 (87.2)
1	464 (12.6)
≥2	7 (0.2)
Delivery mode
Vaginal delivery	1931 (52.3)
Cesarean section	1528 (41.4)
Unknown	233 (6.3)
Infant sex
Male	1891 (51.2)
Female	1763 (47.8)
Unknown	38 (1.0)
Birth season
Winter	861 (23.3)
Spring	716 (19.4)
Summer	881 (23.9)
Fall	1234 (33.4)
Birth weight (g)	3367.3 ± 457.7
Gestational age (weeks)	39.2 ± 1.6
Low birth weight	106 (2.9)
Preterm birth	168 (4.6)

## Sheet: Supplementary Table 4
Supplementary Table 4. The associations between RBC folate and child neurodevelopmental phenotypes.
Phenotype	Beta	P_value	Type
folate_MOD	0.111491	1.66e-05	Growth
VB2_MOD	0.0818435	0.00163334	Growth
VB6_MOD	0.0688492	0.00823421	Growth
m24_bayley4	0.0612335	0.00747229	Cognition
m24_bayley5	0.0619931	0.00661105	Cognition
m24_bayley6	0.0568288	0.0119354	Cognition
m24_bayley7	0.0573752	0.0111344	Cognition
m24_bayley16	0.0267948	0.242725	Behavior
m24_bayley17	0.0271204	0.236899	Behavior
m24_bayley19	0.00540708	0.815526	Behavior
m24_bayley20	0.00271469	0.906788	Behavior
m24_bayley41	-0.0114084	0.61715	Behavior
m24_bayley42	-0.0134167	0.556306	Behavior
RELACT1CD	-0.0504531	0.0550784	Behavior
RELACT2CD	-0.0018801	0.943054	Behavior
RELACT3CD	-0.0216758	0.40971	Behavior
RELACT4_1CD	-0.0260388	0.322371	Behavior
RELACT4_2CD	-0.0352829	0.484332	Behavior
RELACT5CD	-0.00472037	0.85759	Behavior
AUDIOCD	NA	0.489477	Cognition
ATTENCD	0.0352071	0.200782	Cognition
ATTITCD	0.0246577	0.374698	Cognition
EMOTICD	Inf	0.493768	Cognition
ABNORCD	Inf	0.501027	Cognition
WSBD	0.0228311	0.388257	Cognition
WSIN	0.0528244	0.0474055	Cognition
WSMR	0.0448803	0.0919434	Cognition
WSBS	0.0482652	0.0653583	Cognition
WSPM	0.0281453	0.288409	Cognition
BSSI	0.0328671	0.215577	Cognition
WSPC	0.04598	0.0840791	Cognition
WSCA	0.0358811	0.170558	Cognition
WSZL	-0.00460393	0.862963	Cognition
WSOA	0.0374787	0.157079	Cognition
WSCAR	0.0390643	0.13725	Cognition
WSCAS	0.0309591	0.236901	Cognition
LBVCI	0.0402808	0.130064	Cognition
VCI	0.0461018	0.0829187	Cognition
VCIP	0.0554281	0.0367051	Cognition
LBVSI	0.039974	0.132634	Cognition
VSI	0.0362833	0.17252	Cognition
VSIP	0.0416339	0.117286	Cognition
LBFRI	0.0589077	0.027116	Cognition
FRI	0.0596915	0.02516	Cognition
FRIP	0.0590939	0.0264577	Cognition
LBWMI	0.0221022	0.406443	Cognition
WMI	0.0242194	0.362507	Cognition
WMIP	0.0265528	0.317881	Cognition
LBPSI	0.0400863	0.127062	Cognition
PSIRevised	0.0412382	0.116034	Cognition
PSIP	0.0430083	0.101282	Cognition
LBFSIQ	0.0506101	0.0572291	Cognition
FSIQ	0.0519089	0.0510368	Cognition
FSIQP	0.0582676	0.0279294	Cognition
IEDECS	0.000910899	0.974467	Cognition
IEDEEDS	-0.0316167	0.304909	Cognition
IEDEPRE	0.0181702	0.525495	Cognition
IEDES1	0.0265456	0.3538	Cognition
IEDES2	-0.00549868	0.84754	Cognition
IEDES3	0.0737041	0.0103002	Cognition
IEDES4	0.0412456	0.154664	Cognition
IEDES5	-0.0354484	0.220724	Cognition
IEDES6	-0.00254016	0.93024	Cognition
IEDES7	-0.0297947	0.324197	Cognition
IEDES8	-0.0316167	0.304909	Cognition
IEDES9	0.070239	0.0431661	Cognition
IEDTL	-0.00167419	0.961665	Cognition
IEDTLS1	0.0155948	0.586126	Cognition
IEDTLS2	0.0131659	0.646241	Cognition
IEDTLS3	0.0591509	0.0393996	Cognition
IEDTLS4	0.0194215	0.502154	Cognition
IEDTLS5	-0.0342657	0.235659	Cognition
IEDTLS6	-0.0167075	0.564602	Cognition
IEDTLS7	-0.0219222	0.468441	Cognition
IEDTLS8	-0.0581423	0.0601412	Cognition
IEDTLS9	0.0419833	0.227955	Cognition
IEDTT	0.0331979	0.337296	Cognition
IEDTTA	0.0142889	0.617774	Cognition
IEDTTS1	0.0192004	0.503516	Cognition
IEDTTS2	-0.000291971	0.991864	Cognition
IEDTTS3	0.0520787	0.0699104	Cognition
IEDTTS4	0.0606381	0.0363397	Cognition
IEDTTS5	-0.0386338	0.181261	Cognition
IEDTTS6	-0.0134288	0.643257	Cognition
IEDTTS7	-0.0299965	0.317703	Cognition
IEDTTS8	-0.0370023	0.229885	Cognition
IEDTTS9	0.0615885	0.0752507	Cognition
IEDYCOST	-0.0138116	0.629085	Cognition
IEDYERT	0.0408914	0.237444	Cognition
IEDYERTA	0.0142261	0.619546	Cognition
IEDYSTCO	-0.010418	0.714248	Cognition
PALFAMS	0.0271712	0.340794	Cognition
PALMETS	-0.0216371	0.448482	Cognition
PALNPR	-0.00227457	0.936795	Cognition
PALTA	-0.0136975	0.631067	Cognition
PALTA2	-0.0426024	0.135272	Cognition
PALTA4	0.00702944	0.805178	Cognition
PALTA6	-0.0254158	0.373038	Cognition
PALTA8	0.0052209	0.854779	Cognition
PALTE	-0.0180553	0.527038	Cognition
PALTE2	-0.00312607	0.914189	Cognition
PALTE4	0.0045621	0.87341	Cognition
PALTE6	-0.0369837	0.195414	Cognition
PALTE8	0.0154599	0.588035	Cognition
PALTEA	-0.0112546	0.694388	Cognition
PALTEA2	-0.00312607	0.914189	Cognition
PALTEA4	0.0046901	0.869998	Cognition
PALTEA6	-0.034012	0.235913	Cognition
PALTEA8	-0.00301953	0.915658	Cognition
RTIFES	0.0245018	0.38923	Cognition
RTIFESI	0.012252	0.667163	Cognition
RTIFESNR	0.0171857	0.548187	Cognition
RTIFESPR	0.0253617	0.373892	Cognition
RTIFMDMT	0.0357213	0.20982	Cognition
RTIFMDRT	0.00416341	0.884049	Cognition
RTIFMMT	0.0306649	0.281782	Cognition
RTIFMRT	5.65E-05	0.998422	Cognition
RTIFMTSD	-0.0164157	0.564794	Cognition
RTIFRTSD	-0.0104363	0.716132	Cognition
RTISES	0.0114367	0.686878	Cognition
RTISESI	0.0214541	0.450132	Cognition
RTISESNR	0.0652094	0.0233541	Cognition
RTISESPR	0.00822635	0.772473	Cognition
RTISMDMT	0.0352713	0.216595	Cognition
RTISMDRT	-0.00830965	0.771123	Cognition
RTISMMT	0.0224477	0.432025	Cognition
RTISMRT	-0.00564913	0.84324	Cognition
RTISMTSD	-0.0112712	0.693285	Cognition
RTISRTSD	0.0122277	0.669058	Cognition
RVPA	0.0125701	0.661438	Cognition
RVPLSD	0.00880278	0.758056	Cognition
RVPMDL	0.00598934	0.834386	Cognition
RVPML	0.00465996	0.87065	Cognition
RVPPFA	-0.00222429	0.938383	Cognition
RVPPH	0.03968	0.165165	Cognition
RVPTFA	0.000658655	0.981752	Cognition
RVPTH	0.0396851	0.165111	Cognition
RVPTM	-0.0396851	0.165111	Cognition
SWMBE	-0.0573647	0.04416	Cognition
SWMBE4	-0.0376135	0.187392	Cognition
SWMBE6	-0.0070929	0.803709	Cognition
SWMBE8	-0.0709273	0.0127351	Cognition
SWMDE	-0.0233249	0.415702	Cognition
SWMDE6	0.0442673	0.122009	Cognition
SWMDE8	-0.0229979	0.422038	Cognition
SWMPR	#NAME?	0.814431	Cognition
SWMS	-0.0566041	0.0462146	Cognition
SWMS6	-0.0458018	0.107811	Cognition
SWMTE	-0.0527631	0.064311	Cognition
SWMTE4	-0.0436135	0.126223	Cognition
SWMTE6	-0.00378079	0.894632	Cognition
SWMTE8	-0.0634068	0.0262624	Cognition
SWMWE	-0.0116718	0.684086	Cognition
SWMWE4	-0.0435064	0.128545	Cognition
SWMWE6	0.0460563	0.108086	Cognition
SWMWE8	-0.0125106	0.66242	Cognition
DSM_attention_score	0.0385502	0.319156	Behavior
DSM_hyperactivity_score	0.0401075	0.296725	Behavior
SNAP_attention_totalscore	0.0601837	0.115897	Behavior
SNAP_attention_avg	0.0601837	0.115897	Behavior
SNAP_attention_num	0.0590106	0.127317	Behavior
SNAP_hyperactivity_totalscore	0.0378797	0.322587	Behavior
SNAP_hyperactivity_avg	0.0378797	0.322587	Behavior
SNAP_hyperactivity_num	0.0139766	0.718174	Behavior
SNAP_mixture_totalscore	0.0548288	0.150264	Behavior
SNAP_mixture_avg	0.0548288	0.150264	Behavior
SNAP_mixture_num	0.0540297	0.160587	Behavior
SNAP_opposition_totalscore	0.0520561	0.173212	Behavior
SNAP_opposition_avg	0.0520561	0.173212	Behavior
SNAP_opposition_num	0.0574891	0.138115	Behavior
y7pemotion	0.0312555	0.270363	Behavior
y7pconduct	0.0206331	0.464997	Behavior
y7phyper	0.0344188	0.218793	Behavior
y7ppeer	-0.0423624	0.133441	Behavior
y7pprosoc	-0.00203939	0.94154	Behavior
y7pebdtot	0.0198372	0.480727	Behavior
y7Brief_inhibit	0.0389267	0.162654	Cognition
y7Brief_shift	-0.00667878	0.813728	Cognition
y7Brief_emotionalcontrol	0.00891632	0.753089	Cognition
y7Brief_initiate	0.0595214	0.0348059	Cognition
y7Brief_workingmemory	0.0455637	0.106764	Cognition
y7Brief_plan	0.0592251	0.0356158	Cognition
y7Brief_org_of_materials	0.0707829	0.0123073	Cognition
y7Brief_monitor	0.0668758	0.0169081	Cognition
y7Inhibit_index	0.0454602	0.106766	Cognition
y7Shift_index	-0.00995953	0.724803	Cognition
y7Emotional_index	0.0012578	0.964679	Cognition
y7Initiate_index	0.0535027	0.0590906	Cognition
y7WM_index	0.0457137	0.106537	Cognition
y7Plan_index	0.0574794	0.0414793	Cognition
y7Org_of_Materials_index	0.0700615	0.0129274	Cognition
y7Monitor_index	0.0653056	0.0209239	Cognition
y7BR_index	0.0147173	0.603018	Cognition
y7Metacognition_index	0.0641953	0.0240451	Cognition
y7BRIEF_total	0.0489697	0.0858035	Cognition
ch1_4y	-0.0377143	0.496122	Brain
ch2_4y	-0.0911722	0.0982132	Brain
ch3_4y	-0.0202383	0.715124	Brain
ch4_4y	-0.0233276	0.67396	Brain
ch5_4y	-0.0491481	0.373113	Brain
ch6_4y	-0.0469271	0.396926	Brain
ch7_4y	-0.135256	0.0142233	Brain
ch8_4y	-0.0975415	0.0778425	Brain
ch9_4y	-0.0117819	0.831567	Brain
ch10_4y	-0.0432035	0.434578	Brain
ch11_4y	-0.0289606	0.601235	Brain
ch12_4y	-0.10363	0.0596181	Brain
ch13_4y	-0.0618278	0.262811	Brain
ch14_4y	-0.0190197	0.728913	Brain
ch15_4y	0.000441691	0.993567	Brain
ch16_4y	0.0384847	0.485904	Brain
ch17_4y	0.013735	0.804199	Brain
ch18_4y	-0.0583491	0.289019	Brain
ch19_4y	0.0276847	0.616662	Brain
ch20_4y	0.0644309	0.244448	Brain
ch21_4y	-0.0151495	0.784683	Brain
ch22_4y	-0.0408403	0.460405	Brain
ch23_4y	-0.0556571	0.314871	Brain
ch24_4y	0.00626379	0.909656	Brain
ch25_4y	-0.0196936	0.721248	Brain
ch26_4y	-0.09623	0.0805246	Brain
ch27_4y	-0.0359067	0.515507	Brain
ch28_4y	-0.0213306	0.698093	Brain
ch29_4y	0.0511784	0.35487	Brain
ch30_4y	0.00830555	0.880232	Brain
ch31_4y	-0.0798206	0.148283	Brain
ch32_4y	-0.0776307	0.15669	Brain
ch33_4y	-0.0293123	0.596654	Brain
ch34_4y	0.00946296	0.864069	Brain
ch35_4y	0.020404	0.711664	Brain
ch36_4y	0.00926285	0.866671	Brain
ch37_4y	-0.1025	0.0609439	Brain
ch38_4y	-0.0215383	0.696848	Brain
ch39_4y	-0.100288	0.0689647	Brain
ch40_4y	-0.0245347	0.657989	Brain
ch41_4y	-0.0665174	0.22956	Brain
ch42_4y	0.0467393	0.397442	Brain
ch43_4y	-0.0515678	0.347046	Brain
ch44_4y	-0.0193005	0.727649	Brain
ch45_4y	-0.0294967	0.594541	Brain
ch46_4y	0.0772398	0.159688	Brain
ch47_4y	0.0321649	0.560603	Brain
ch48_4y	-0.0463831	0.402009	Brain
ch49_4y	0.0436131	0.427436	Brain
ch50_4y	-0.0253571	0.647215	Brain
ch51_4y	0.0766771	0.165304	Brain
ch52_4y	0.0050392	0.927285	Brain
ch53_4y	-0.0265983	0.629838	Brain
ch54_4y	-0.0304554	0.58123	Brain
ch55_4y	0.0454493	0.406442	Brain
ch56_4y	0.0649382	0.240454	Brain
ch57_4y	0.0262996	0.633789	Brain
ch58_4y	0.0934233	0.090839	Brain
ch59_4y	0.087126	0.112158	Brain
ch60_4y	0.0394088	0.47291	Brain
ch61_4y	0.0055942	0.919419	Brain
ch62_4y	0.0379788	0.492955	Brain
ch63_4y	-0.0318188	0.565896	Brain
ch64_4y	0.0087051	0.875251	Brain
ch65_4y	0.0082435	0.881809	Brain
ch66_4y	-0.0372863	0.498389	Brain
ch67_4y	0.0164169	0.766867	Brain
ch68_4y	0.0382408	0.487865	Brain
ch69_4y	-0.00602451	0.913134	Brain
ch70_4y	0.0193936	0.724785	Brain
ch71_4y	0.0267709	0.628694	Brain
ch72_4y	0.0182121	0.736761	Brain
ch73_4y	0.0801364	0.147338	Brain
ch74_4y	-0.0232117	0.671205	Brain
ch75_4y	-0.0867054	0.115851	Brain
ch76_4y	-0.0653967	0.237466	Brain
ch77_4y	-0.136848	0.0131306	Brain
ch78_4y	-0.00937571	0.864151	Brain
ch79_4y	-0.0628296	0.256447	Brain
ch80_4y	-0.0808995	0.142814	Brain
ch1_8y	0.0555414	0.131453	Brain
ch2_8y	0.0176993	0.630896	Brain
ch3_8y	0.046249	0.209386	Brain
ch4_8y	0.047718	0.194834	Brain
ch5_8y	0.009469	0.796811	Brain
ch6_8y	0.0202422	0.58203	Brain
ch7_8y	0.0835845	0.0229152	Brain
ch8_8y	0.00467304	0.899064	Brain
ch9_8y	0.0141719	0.700488	Brain
ch10_8y	-0.0210915	0.567443	Brain
ch11_8y	-0.00723024	0.844538	Brain
ch12_8y	0.0191648	0.60327	Brain
ch13_8y	0.025522	0.488849	Brain
ch14_8y	-0.000525706	0.988607	Brain
ch15_8y	0.0103971	0.777906	Brain
ch16_8y	-0.00788758	0.830407	Brain
ch17_8y	0.0357652	0.332032	Brain
ch18_8y	0.00797985	0.828787	Brain
ch19_8y	-0.031167	0.398051	Brain
ch20_8y	0.0362058	0.325074	Brain
ch21_8y	0.0214582	0.559841	Brain
ch22_8y	-0.00787315	0.830644	Brain
ch23_8y	0.0836132	0.0230969	Brain
ch24_8y	-0.000340672	0.99262	Brain
ch25_8y	-0.0130723	0.723001	Brain
ch26_8y	-0.0038208	0.917474	Brain
ch27_8y	0.00218111	0.952822	Brain
ch28_8y	-0.0227033	0.536377	Brain
ch29_8y	0.00404531	0.912488	Brain
ch30_8y	-0.00199575	0.956856	Brain
ch31_8y	-0.0198651	0.588012	Brain
ch32_8y	-0.0115433	0.751876	Brain
ch33_8y	0.0353968	0.336561	Brain
ch34_8y	0.00552037	0.881052	Brain
ch35_8y	-0.00505091	0.890971	Brain
ch36_8y	-0.00696771	0.849812	Brain
ch37_8y	-0.0198971	0.587721	Brain
ch38_8y	0.0211421	0.565373	Brain
ch39_8y	-0.0170566	0.642897	Brain
ch40_8y	-0.0108232	0.768629	Brain
ch41_8y	0.0185168	0.615517	Brain
ch42_8y	0.00321818	0.930494	Brain
ch43_8y	0.0260064	0.480644	Brain
ch44_8y	0.0307311	0.404077	Brain
ch45_8y	0.00766165	0.835231	Brain
ch46_8y	0.0385918	0.294822	Brain
ch47_8y	-0.00779045	0.832549	Brain
ch48_8y	0.0206961	0.57402	Brain
ch49_8y	0.0157452	0.668999	Brain
ch50_8y	-0.000817226	0.982266	Brain
ch51_8y	0.00164652	0.964407	Brain
ch52_8y	0.00180564	0.960962	Brain
ch53_8y	0.0310554	0.399774	Brain
ch54_8y	0.0161812	0.660181	Brain
ch55_8y	0.0170314	0.643554	Brain
ch56_8y	0.0273091	0.458244	Brain
ch57_8y	0.0286378	0.437004	Brain
ch58_8y	-0.0136726	0.710971	Brain
ch59_8y	-0.0601341	0.102054	Brain
ch60_8y	-0.0275973	0.45412	Brain
ch61_8y	-0.00199797	0.956484	Brain
ch62_8y	-0.0332582	0.367052	Brain
ch63_8y	-0.00731364	0.842519	Brain
ch64_8y	-0.000756406	0.983634	Brain
ch65_8y	-0.026472	0.471714	Brain
ch66_8y	-0.0456607	0.212872	Brain
ch67_8y	-0.0803809	0.0290237	Brain
ch68_8y	-0.020325	0.581624	Brain
ch69_8y	-0.0197538	0.591651	Brain
ch70_8y	-0.0216229	0.557763	Brain
ch71_8y	-0.0226476	0.537028	Brain
ch72_8y	-0.0446865	0.224829	Brain
ch73_8y	-0.0290005	0.431658	Brain
ch74_8y	-0.0686072	0.0619761	Brain
ch75_8y	-0.0178488	0.627474	Brain
ch76_8y	-0.0567828	0.123514	Brain
ch77_8y	-0.0402413	0.274214	Brain
ch78_8y	0.00398299	0.913979	Brain
ch79_8y	-0.0231885	0.529662	Brain
ch80_8y	-0.00384702	0.916533	Brain
omissionRate_4y	-0.0238304	0.557305	Brain
errRate_4y	0.0272996	0.5263	Brain
accRate_4y	0.00243174	0.953519	Brain
averageRT_4y	-0.0232318	0.585957	Brain
omissionRate_8y	-0.06305	0.0756292	Brain
errRate_8y	-0.0135196	0.703675	Brain
accRate_8y	0.0480754	0.174881	Brain
averageRT_8y	-0.0392705	0.268271	Brain
SRS_SF_Total_Score	0.0106076	0.687081	Behavior
SRS_SF_socialcog	0.0123396	0.639828	Behavior
SRS_SF_socialcom	-0.0147752	0.574309	Behavior
SRS_SF_autism	0.0108234	0.680648	Behavior
SDQ_Peer_problems	-0.0277627	0.29101	Behavior
SDQ_Conduct_problems	-0.00829636	0.751982	Behavior
SDQ_Hyperactivity	-0.000528639	0.983945	Behavior
SDQ_Prosocial	-0.0290384	0.266836	Behavior
SDQ_Emotion_problems	0.0295567	0.260725	Behavior
SDQ_Total_Difficulty_Score	-0.00886617	0.735913	Behavior
delta_height	0.0133584	0.654832	Growth
delta_Peer_problems	-0.0322569	0.308644	Behavior
delta_Conduct_problems	0.0110949	0.726682	Behavior
delta_Hyperactivity	0.0220586	0.484196	Behavior
delta_Prosocial	0.0228813	0.470271	Behavior
delta_Emotion_problems	-0.011343	0.720797	Behavior
delta_SDQscore	-0.00691146	0.827253	Behavior
delta_ch1	0.130875	0.0719807	Brain
delta_ch2	0.0779123	0.286104	Brain
delta_ch3	0.112215	0.123271	Brain
delta_ch4	-0.0598804	0.409282	Brain
delta_ch5	-0.0543782	0.457613	Brain
delta_ch6	0.0791223	0.277997	Brain
delta_ch7	0.188766	0.00932535	Brain
delta_ch8	-0.017649	0.80925	Brain
delta_ch9	-0.0808288	0.268268	Brain
delta_ch10	0.0127479	0.861847	Brain
delta_ch11	0.0576309	0.431007	Brain
delta_ch12	0.0604456	0.40816	Brain
delta_ch13	0.0517605	0.475923	Brain
delta_ch14	-0.0246429	0.730101	Brain
delta_ch15	0.0777269	0.272073	Brain
delta_ch16	-0.0612737	0.39307	Brain
delta_ch17	-0.0310293	0.669773	Brain
delta_ch18	0.0401642	0.579562	Brain
delta_ch19	-0.0714354	0.328073	Brain
delta_ch20	-0.0511062	0.485005	Brain
delta_ch21	0.130116	0.0744497	Brain
delta_ch22	0.0042661	0.953292	Brain
delta_ch23	0.0456388	0.532685	Brain
delta_ch24	-0.0173412	0.810691	Brain
delta_ch25	-0.00840657	0.907695	Brain
delta_ch26	0.0410684	0.574829	Brain
delta_ch27	0.0445097	0.540267	Brain
delta_ch28	0.0102985	0.887917	Brain
delta_ch29	-0.0243077	0.734264	Brain
delta_ch30	0.0170822	0.815451	Brain
delta_ch31	-0.0203019	0.781481	Brain
delta_ch32	-0.0181255	0.804002	Brain
delta_ch33	0.150618	0.0385116	Brain
delta_ch34	0.0522279	0.474196	Brain
delta_ch35	0.0174171	0.811827	Brain
delta_ch36	0.0351313	0.631556	Brain
delta_ch37	0.0236541	0.745573	Brain
delta_ch38	-0.105956	0.143973	Brain
delta_ch39	0.010282	0.887622	Brain
delta_ch40	0.0244189	0.738272	Brain
delta_ch41	-0.0775242	0.286673	Brain
delta_ch42	0.0080247	0.912493	Brain
delta_ch43	0.044333	0.542342	Brain
delta_ch44	0.0135159	0.852057	Brain
delta_ch45	0.0744826	0.308888	Brain
delta_ch46	0.130159	0.0739814	Brain
delta_ch47	0.0193975	0.790777	Brain
delta_ch48	0.0134882	0.853303	Brain
delta_ch49	0.00176358	0.980647	Brain
delta_ch50	0.102608	0.158265	Brain
delta_ch51	-0.0398156	0.5866	Brain
delta_ch52	0.0469423	0.52205	Brain
delta_ch53	0.115051	0.113563	Brain
delta_ch54	0.0333116	0.648968	Brain
delta_ch55	0.12855	0.0771451	Brain
delta_ch56	-0.034835	0.634226	Brain
delta_ch57	0.0652747	0.372695	Brain
delta_ch58	-0.0816826	0.264723	Brain
delta_ch59	-0.137799	0.054355	Brain
delta_ch60	-0.0552803	0.448936	Brain
delta_ch61	0.00638288	0.930486	Brain
delta_ch62	-0.0965936	0.181422	Brain
delta_ch63	-0.0108581	0.882209	Brain
delta_ch64	-0.0172152	0.813962	Brain
delta_ch65	-0.0209224	0.775243	Brain
delta_ch66	-0.0488795	0.504191	Brain
delta_ch67	-0.0769199	0.288	Brain
delta_ch68	-0.0580765	0.424171	Brain
delta_ch69	-0.0126413	0.862826	Brain
delta_ch70	-0.00309558	0.965262	Brain
delta_ch71	-0.0289512	0.690047	Brain
delta_ch72	-0.172803	0.016695	Brain
delta_ch73	-0.0810586	0.266214	Brain
delta_ch74	-0.0972119	0.180692	Brain
delta_ch75	0.015974	0.826359	Brain
delta_ch76	-0.0279363	0.701457	Brain
delta_ch77	0.000792131	0.991339	Brain
delta_ch78	-0.0640956	0.373009	Brain
delta_ch79	-0.0346122	0.634747	Brain
delta_ch80	-0.0136739	0.850027	Brain
d3sf_length	-0.00518678	0.832616	Growth
brwe	-0.00546624	0.802843	Growth
d3sf_headcir	0.00992703	0.708917	Growth
BSH1_height1	0.0203127	0.663935	Growth
BSHWT1_weight1	-0.06282	0.416048	Growth
BSHW1_head1	0.0225054	0.63969	Growth
heightSBC7y	0.0113525	0.667694	Growth
sheightSBC7y	-0.0293775	0.297249	Growth
weightSBC7y	-0.0189598	0.47257	Growth
HCSBC7y	0.00235087	0.936013	Growth
WCSBC7y	0.00259939	0.92762	Growth
length_3	-0.00164789	0.96016	Growth
headcir_3	0.01979	0.551438	Growth
weight_3	-0.000339632	0.991255	Growth
length_42	0.0151383	0.635589	Growth
headcir_42	0.0355345	0.26713	Growth
weight_42	-0.00268255	0.931668	Growth
length_180	0.00627956	0.855232	Growth
headcir_180	0.0227684	0.505336	Growth
weight_180	-0.025292	0.465326	Growth
length_360	0.029488	0.386849	Growth
headcir_360	0.0427235	0.193896	Growth
weight_360	0.0111006	0.743051	Growth
length_720	0.0159361	0.631048	Growth
headcir_720	-0.0319841	0.350375	Growth
weight_720	0.00637442	0.847522	Growth
length_1440	0.0155468	0.696161	Growth
headcir_1440	-0.0323349	0.508757	Growth
weight_1440	-0.0118309	0.798199	Growth
length_2555	0.0153291	0.682217	Growth
headcir_2555	0.00032055	0.994446	Growth
weight_2555	-0.00841741	0.820556	Growth
ch1.ch7_4y	-0.184731	0.440599
ch2.ch7_4y	0.1938	0.223797
ch3.ch7_4y	0.12569	0.492656
ch4.ch7_4y	0.115847	0.454531
ch5.ch7_4y	-0.228876	0.123324
ch6.ch7_4y	0.118795	0.444501
ch7.ch8_4y	0.0816521	0.569155
ch7.ch9_4y	0.130977	0.373031
ch7.ch10_4y	-0.156315	0.351798
ch7.ch11_4y	0.128921	0.382076
ch7.ch12_4y	0.00244116	0.987368
ch7.ch13_4y	0.0525594	0.755147
ch7.ch14_4y	-0.0175977	0.910545
ch7.ch15_4y	-0.0105347	0.935848
ch7.ch16_4y	0.0761345	0.610119
ch7.ch17_4y	0.116555	0.446155
ch7.ch18_4y	-0.0298576	0.833879
ch7.ch19_4y	0.0889933	0.579563
ch7.ch20_4y	0.133675	0.403978
ch7.ch21_4y	-0.250124	0.110447
ch7.ch22_4y	0.351159	0.0551811
ch7.ch23_4y	-0.0229338	0.88926
ch7.ch24_4y	0.113074	0.564494
ch7.ch25_4y	0.0990459	0.563806
ch7.ch26_4y	0.256373	0.151397
ch7.ch27_4y	0.149035	0.365568
ch7.ch28_4y	0.350544	0.0143821
ch7.ch29_4y	0.207897	0.261778
ch7.ch30_4y	0.101291	0.428669
ch7.ch31_4y	-0.110398	0.51372
ch7.ch32_4y	0.311176	0.0331375
ch7.ch33_4y	0.121179	0.465619
ch7.ch34_4y	-0.160862	0.36954
ch7.ch35_4y	-0.137699	0.555537
ch7.ch36_4y	0.235766	0.116322
ch7.ch37_4y	0.245082	0.0751877
ch7.ch38_4y	-0.021152	0.894313
ch7.ch39_4y	-0.110585	0.526505
ch7.ch40_4y	0.0993925	0.608113
ch7.ch41_4y	-0.0603176	0.677363
ch7.ch42_4y	-0.233861	0.147882
ch7.ch43_4y	-0.216194	0.236233
ch7.ch44_4y	0.237303	0.222448
ch7.ch45_4y	-0.206901	0.247647
ch7.ch46_4y	-0.15461	0.296329
ch7.ch47_4y	-0.0497318	0.751157
ch7.ch48_4y	0.0961723	0.551381
ch7.ch49_4y	-0.0496647	0.763679
ch7.ch50_4y	-0.202164	0.249604
ch7.ch51_4y	-0.0647714	0.698631
ch7.ch52_4y	-0.227312	0.354653
ch7.ch53_4y	-0.160752	0.382988
ch7.ch54_4y	0.012872	0.935298
ch7.ch55_4y	0.237617	0.130831
ch7.ch56_4y	-0.0901886	0.592363
ch7.ch57_4y	0.239619	0.120855
ch7.ch58_4y	-0.116914	0.466409
ch7.ch59_4y	0.0615041	0.744212
ch7.ch60_4y	0.385897	0.00542327
ch7.ch61_4y	0.10133	0.59118
ch7.ch62_4y	-0.192106	0.237195
ch7.ch63_4y	0.0125585	0.934763
ch7.ch64_4y	-0.0985347	0.543004
ch7.ch65_4y	-0.0266843	0.864394
ch7.ch66_4y	-0.0345921	0.831946
ch7.ch67_4y	-0.142554	0.367452
ch7.ch68_4y	0.356923	0.0283763
ch7.ch69_4y	-0.0638275	0.687417
ch7.ch70_4y	-0.242773	0.148646
ch7.ch71_4y	0.0598793	0.736104
ch7.ch72_4y	-0.0103444	0.948655
ch7.ch73_4y	0.0603584	0.686841
ch7.ch74_4y	0.0837537	0.587061
ch7.ch75_4y	0.399041	0.0221278
ch7.ch76_4y	0.112466	0.56728
ch7.ch77_4y	-0.0261989	0.873822
ch7.ch78_4y	-0.164875	0.248174
ch7.ch79_4y	0.0177773	0.925174
ch7.ch80_4y	0.0306039	0.890091
ch1.ch7_8y	-0.0641183	0.771169
ch2.ch7_8y	-0.0162172	0.892285
ch3.ch7_8y	0.0470046	0.692243
ch4.ch7_8y	-0.230072	0.0485464
ch5.ch7_8y	0.00971017	0.930227
ch6.ch7_8y	0.163179	0.184164
ch7.ch8_8y	0.162746	0.160881
ch7.ch9_8y	0.114521	0.282138
ch7.ch10_8y	-0.162319	0.157541
ch7.ch11_8y	-0.119494	0.229632
ch7.ch12_8y	0.0177325	0.864149
ch7.ch13_8y	-0.276954	0.011249
ch7.ch14_8y	-0.0219378	0.837761
ch7.ch15_8y	0.00895963	0.930601
ch7.ch16_8y	-0.00689005	0.944711
ch7.ch17_8y	-0.197277	0.0652535
ch7.ch18_8y	-0.0965752	0.368962
ch7.ch19_8y	0.0376049	0.705508
ch7.ch20_8y	-0.180489	0.0708352
ch7.ch21_8y	0.134597	0.205679
ch7.ch22_8y	-0.00311621	0.978416
ch7.ch23_8y	-0.0604537	0.559406
ch7.ch24_8y	0.162859	0.11831
ch7.ch25_8y	0.210472	0.0728186
ch7.ch26_8y	0.0243727	0.821245
ch7.ch27_8y	-0.0774633	0.473343
ch7.ch28_8y	0.0147325	0.892642
ch7.ch29_8y	0.0367361	0.716179
ch7.ch30_8y	0.109954	0.284376
ch7.ch31_8y	0.0471595	0.640533
ch7.ch32_8y	-0.191614	0.0510186
ch7.ch33_8y	-0.0581557	0.599415
ch7.ch34_8y	-0.120415	0.300659
ch7.ch35_8y	0.0253939	0.797524
ch7.ch36_8y	0.122056	0.245771
ch7.ch37_8y	-0.0249509	0.806553
ch7.ch38_8y	0.0645821	0.563497
ch7.ch39_8y	-0.16442	0.102843
ch7.ch40_8y	-0.049832	0.622038
ch7.ch41_8y	0.0807184	0.44047
ch7.ch42_8y	0.0904729	0.376272
ch7.ch43_8y	0.317233	0.00899694
ch7.ch44_8y	0.0835145	0.380685
ch7.ch45_8y	-0.136318	0.22832
ch7.ch46_8y	0.210348	0.0371597
ch7.ch47_8y	0.0140155	0.8992
ch7.ch48_8y	-0.00319658	0.974225
ch7.ch49_8y	0.107407	0.277241
ch7.ch50_8y	-0.0456209	0.664272
ch7.ch51_8y	-0.0762705	0.449227
ch7.ch52_8y	-0.144824	0.17289
ch7.ch53_8y	0.216968	0.0621204
ch7.ch54_8y	0.0692646	0.496549
ch7.ch55_8y	-0.336194	0.00306714
ch7.ch56_8y	-0.337168	0.00531078
ch7.ch57_8y	-0.120394	0.227216
ch7.ch58_8y	-0.0978007	0.396167
ch7.ch59_8y	0.0924819	0.409165
ch7.ch60_8y	-0.0818505	0.417894
ch7.ch61_8y	-0.0739664	0.501901
ch7.ch62_8y	0.0250332	0.822547
ch7.ch63_8y	0.044252	0.653923
ch7.ch64_8y	0.037501	0.738933
ch7.ch65_8y	0.198907	0.0865737
ch7.ch66_8y	0.071961	0.532338
ch7.ch67_8y	0.0827798	0.443481
ch7.ch68_8y	0.0627409	0.537667
ch7.ch69_8y	-0.0667956	0.506512
ch7.ch70_8y	-0.0880568	0.428621
ch7.ch71_8y	0.0784954	0.42172
ch7.ch72_8y	0.150145	0.193619
ch7.ch73_8y	-0.194662	0.06448
ch7.ch74_8y	-0.0197121	0.897689
ch7.ch75_8y	0.0792969	0.459069
ch7.ch76_8y	-0.204792	0.0481208
ch7.ch77_8y	-0.0566091	0.624123
ch7.ch78_8y	-0.249864	0.017193
ch7.ch79_8y	0.156961	0.272005
ch7.ch80_8y	-0.0668069	0.570815

## Sheet: Supplementary Table 6
Supplementary Table 6. Instrument strength (milk intake SNPs)
SNP	βx	SEx	F-statistic
16:49468667:A:G	−0.00294	0.00065	20.54
17:66579828:C:T	0.00914	0.00201	20.63
2:136721603:A:G	0.00346	0.00074	21.87
2:136770509:G:A	0.00442	0.00095	21.69
3:101211487:A:G	0.00279	0.00059	22.04
6:4079858:C:G	−0.00364	0.00075	23.6
6:33017082:G:A	0.00351	0.00078	20.03

## Sheet: Supplementary Table 7
Supplementary Table 7. Causal estimates from MR analysis
Method	β (Effect of milk intake on FRAA)	SE	P-value	Egger Intercept (P)
IVW (fixed)	−118.78	429.2	0.782	–
MR-Egger (slope)	−290.94	1582.03	0.854	0.79 (0.91)
Weighted Median	−520.59	589.57	0.377	–
